# Supplementary material for: Twenty-Four-Hour Ahead Probabilistic Global Horizontal Irradiance Forecasting Using Gaussian Process Regression
Source: MDPI journal article supplement (doi:10.3390/a14060177), 2021-06-02
Supplement: s1 [file s1]

# SAURAN Column Naming Legend

## Contents:

|                                                                 |    |
|-----------------------------------------------------------------|----|
| UKZN: Howard College .....                                      | 1  |
| ZUL: University of Zululand .....                               | 2  |
| MUT: Mangosuthu University of Technology .....                  | 3  |
| VEN: USAid Venda .....                                          | 4  |
| MIN: Mintek Elandsfontein .....                                 | 5  |
| CSIR: CSIR Energy Centre .....                                  | 6  |
| UOP: GIZ University of Pretoria .....                           | 7  |
| GAB: USAid Gaborone .....                                       | 8  |
| NUST: USAid Namibian University of Science and Technology ..... | 9  |
| RVLD: GIZ Richtersveld .....                                    | 10 |
| VRD: GIZ Vanrhynsdorp .....                                     | 11 |
| SALT: Eskom Sutherland SALT .....                               | 12 |
| HELIO: Mariendal .....                                          | 13 |
| STB: Stellenbosch University .....                              | 14 |
| MRB: GIZ Murraysburg .....                                      | 15 |
| GRN: GIZ Graaff-Reinet .....                                    | 16 |
| NMU: Nelson Mandela University .....                            | 17 |
| UFS: GIZ University of Free State .....                         | 18 |
| UFH: USAid University of Fort Hare .....                        | 19 |
| CUT: Central University of Technology .....                     | 20 |
| WST: University of KwaZulu-Natal Westville .....                | 21 |

## UKZN: Howard College

### Heading:

TmStamp

RecNum

AirTC

RH\_Min

CHP1SIrW

CMP11\_1SIrW

CMP11\_2SIrW

CUV5SIrW

WS\_ms\_S\_WVT

WindDir\_D1\_WVT

WindDir\_SD1\_WVT

BP\_mbar\_Min

Rain\_mm\_Tot

EPLAB\_Pyrheliometer\_Max

EPLAB\_Pyranometer\_35622\_Max

EPLAB\_Pyranometer\_35662\_Max

EPLAB\_Pyranometer\_35663\_Max

SPN1dig\_Total\_Avg

SPN1dig\_Diffuse\_Avg

BattV\_Min

Batt24V\_Min

### Translation:

Time Stamp

Record Number

Air Temperature

Relative Humidity

Direct Normal Irradiance (DNI)

Diffuse Horizontal Irradiance (DHI)

Global Horizontal Irradiance (GHI)

Total ultra violet radiation

Wind Speed

Wind direction

Wind direction standard deviation

Barometric pressure

Total rainfall

EPLAB DNI

EPLAB DNI

EPLAB DNI

EPLAB DNI

SPN1 GHI

SPN1 DHI

12V Battery minimum

24V Battery minimum

## ZUL: University of Zululand

| Heading:       | Translation:                             |
|----------------|------------------------------------------|
| TmStamp        | Time Stamp                               |
| RecNum         | Record Number                            |
| GHI_Avg        | Global Horizontal Irradiance (GHI)       |
| DIF_Avg        | Diffuse Horizontal Irradiance (DHI)      |
| DNI_Avg        | Direct Normal Irradiance(DNI)            |
| Temp_Avg       | Temperature                              |
| RH             | Relative Humidity                        |
| Rain_Tot       | Total Rainfall                           |
| WS_Avg         | Wind Speed                               |
| WVec_Mag_Avg   | The Wind Vector Magnitude                |
| WD_Avg         | Wind Direction                           |
| WD_StdDev      | Wind direction standard deviation        |
| BP_Avg         | Barometric pressure                      |
| Bat12_Avg      | 12V Battery Average                      |
| Bat12_Min      | 12V Battery Minimum                      |
| Bat24_Avg      | 24V Battery Average                      |
| Bat24_Min      | 24V Battery Minimum                      |
| LoggerTemp_Avg | Logger Temperature                       |
| DNI Calc_Avg   | Calculated Direct Normal Irradiance(DNI) |
| DNI_Calb_Avg   | N/A                                      |
| Calc_Azimuth   | Calculated Azimuth Angle                 |
| Calc_Tilt      | Calculated Tilt Angle                    |
| Solys_Azimuth  | Azimuth of Solys Tracker                 |
| Solys_Tilt     | Tilt of Solys Tracker                    |
| Solys_Lat      | Latitude of Solys Tracker                |
| Solys_Long     | Longitude of Solys Tracker               |
| Solys_Bar      | N/A                                      |

## MUT: Mangosuthu University of Technology

### Heading:

TmStamp

RecNum

MUT\_Batt\_V\_Avg

MUT\_Batt\_V\_Min

MUT\_Batt\_V\_Max

MUT\_DNI\_NIP\_31955E6\_W\_Avg

MUT\_DNI\_NIP\_31955E6\_W\_Min

MUT\_DNI\_NIP\_31955E6\_W\_Max

MUT\_DNI\_NIP\_31955E6\_kJ\_Tot

MUT\_GHI\_PSP\_34331F3\_W\_Avg

MUT\_GHI\_PSP\_34331F3\_W\_Min

MUT\_GHI\_PSP\_34331F3\_W\_Max

MUT\_GHI\_PSP\_34331F3\_kJ\_Tot

MUT\_DHI\_PSP\_34332F3\_W\_Avg

MUT\_DHI\_PSP\_34332F3\_W\_Min

MUT\_DHI\_PSP\_34332F3\_W\_Max

MUT\_DHI\_PSP\_34332F3\_kJ\_Tot

MUT\_Spare\_PSP\_33583F3\_W\_Avg

MUT\_Spare\_PSP\_33583F3\_W\_Min

MUT\_Spare\_PSP\_33583F3\_W\_Max

MUT\_Spare\_PSP\_33583F3\_kJ\_Tot

MUT\_TUVR\_34623\_W\_Avg

MUT\_TUVR\_34623\_W\_Min

MUT\_TUVR\_34623\_W\_Max

MUT\_TUVR\_34623\_kJ\_Tot

### Translation:

Time Stamp

Record Number

Battery Average

Battery Minimum

Battery Maximum

Average Direct Normal Irradiance(DNI) - Eppley Normal

Incidence Pyrheliometer Model Nip

Minimum Direct Normal Irradiance(DNI) - Eppley Normal

Incidence Pyrheliometer Model Nip

Maximum Direct Normal Irradiance(DNI) - Eppley Normal

Incidence Pyrheliometer Model Nip

Total Direct Normal Irradiance(DNI) - Eppley Normal Incidence

Pyrheliometer Model Nip

Average Global Horizontal Irradiance (GHI) - Eppley Precision

Spectral Pyranometer Model Psp

Minimum Global Horizontal Irradiance (GHI) - Eppley Precision

Spectral Pyranometer Model Psp

Maximum Global Horizontal Irradiance (GHI) - Eppley

Precision Spectral Pyranometer Model Psp

Total Global Horizontal Irradiance (GHI) - Eppley Precision

Spectral Pyranometer Model Psp

Average Diffuse Horizontal Irradiance (DHI) - Eppley Precision

Spectral Pyranometer Model Psp under shadowband

Minimum Diffuse Horizontal Irradiance (DHI) - Eppley

Precision Spectral Pyranometer Model Psp under shadowband

Maximum Diffuse Horizontal Irradiance (DHI) - Eppley

Precision Spectral Pyranometer Model Psp under shadowband

Total Diffuse Horizontal Irradiance (DHI) - Eppley Precision

Spectral Pyranometer Model Psp under shadowband

Average Global Horizontal Irradiance (GHI) - Eppley Precision

Spectral Pyranometer Model Psp

Minimum Global Horizontal Irradiance (GHI) - Eppley Precision

Spectral Pyranometer Model Psp

Maximum Global Horizontal Irradiance (GHI) - Eppley

Precision Spectral Pyranometer Model Psp

Total Global Horizontal Irradiance (GHI) - Eppley Precision

Spectral Pyranometer Model Psp

Average ultra violet radiation in [W/m<sup>2</sup>] in the wavelength range of 299 to 384 nm

Minimum ultra violet radiation in [W/m<sup>2</sup>] in the wavelength range of 299 to 384 nm

Maximum ultra violet radiation in [W/m<sup>2</sup>] in the wavelength range of 299 to 384 nm

Total ultra violet radiation in [W/m<sup>2</sup>] in the wavelength range of 299 to 384 nm

## VEN: USAid Venda

### Heading:

TmStamp  
RecNum  
GHI\_Avg  
DIF\_Avg  
DNI\_Avg  
DNICalc\_Avg  
Temp\_Avg  
RH  
Rain\_Tot  
WS\_Avg  
WVec\_Mag\_Avg  
WD\_Avg  
WD\_StdDev  
WS\_Max  
BP\_Avg  
Bat12\_Avg  
Bat12\_Min  
Bat24\_Avg  
Bat24\_Min  
LoggerTemp\_Avg  
DNI\_Calb\_Avg  
Calc\_Azimuth  
Calc\_Tilt

### Translation:

Time Stamp  
Record Number  
Global Horizontal Irradiance (GHI)  
Diffuse Horizontal Irradiance (DHI)  
Direct Normal Irradiance(DNI)  
Calculated Direct Normal Irradiance(DNI)  
Temperature  
Relative Humidity  
Total Rainfall  
Wind Speed (average)  
The Wind Vector Magnitude  
Wind Direction  
Wind direction standard deviation  
Wind Speed (maximum)  
Barometric pressure  
12V Battery Average  
12V Battery Minimum  
24V Battery Average  
24V Battery Minimum  
Logger Temperature  
N/A  
Calculated Azimuth Angle  
Calculated Tilt Angle

## MIN: Mintek Elandsfontein

| Heading:         | Translation:                             |
|------------------|------------------------------------------|
| TmStamp          | Time Stamp                               |
| RecNum           | Record Number                            |
| GHI_Avg          | Global Horizontal Irradiance (GHI)       |
| DIF_Avg          | Diffuse Horizontal Irradiance (DHI)      |
| DNI_Avg          | Direct Normal Irradiance(DNI)            |
| Temp_Avg         | Temperature                              |
| RH               | Relative Humidity                        |
| Rain_Tot         | Total Rainfall                           |
| WS_Avg           | Wind Speed (average)                     |
| WVec_Mag_Avg     | The Wind Vector Magnitude                |
| WD_Avg           | Wind Direction                           |
| WD_StdDev        | Wind direction standard deviation        |
| BP_Avg           | Barometric pressure                      |
| Bat12_Avg        | 12V Battery Average                      |
| Bat12_Min        | 12V Battery Minimum                      |
| Bat24_Avg        | 24V Battery Average                      |
| Bat24_Min        | 24V Battery Minimum                      |
| LoggerTemp_Avg   | Logger Temperature                       |
| DNICalc_Avg      | Calculated Direct Normal Irradiance(DNI) |
| Calc_Azimuth_Avg | Calculated Azimuth Angle                 |
| Calc_Tilt_Avg    | Calculated Tilt Angle                    |

## CSIR: CSIR Energy Centre

| Heading:       | Translation:                             |
|----------------|------------------------------------------|
| TmStamp        | Time Stamp                               |
| RecNum         | Record Number                            |
| GHI_Avg        | Global Horizontal Irradiance (GHI)       |
| DIF_Avg        | Diffuse Horizontal Irradiance (DHI)      |
| DNI_Avg        | Direct Normal Irradiance(DNI)            |
| Temp_Avg       | Temperature                              |
| RH             | Relative Humidity                        |
| WS_Avg         | Wind Speed (average)                     |
| WVec_Mag_Avg   | The Wind Vector Magnitude                |
| WD_Avg         | Wind Direction                           |
| WD_StdDev      | Wind direction standard deviation        |
| BP_Avg         | Barometric pressure                      |
| Bat12_Avg      | 12V Battery Average                      |
| Bat12_Min      | 12V Battery Minimum                      |
| Bat24_Avg      | 24V Battery Average                      |
| Bat24_Min      | 24V Battery Minimum                      |
| LoggerTemp_Avg | Logger Temperature                       |
| DNICalc_Avg    | Calculated Direct Normal Irradiance(DNI) |
| DNI_2_Avg      | Direct Normal Irradiance(DNI)            |
| Calc_Azimuth   | Calculated Azimuth Angle                 |
| Calc_Tilt      | Calculated Tilt Angle                    |
| Solys_Tilt     | Tilt of Solys Tracker                    |
| Solys_Lat      | Latitude of Solys Tracker                |
| Solys_Long     | Longitude of Solys Tracker               |
| Solys_Bar      | N/A                                      |
| UVA_Avg        | Average UV type A                        |
| UVA_Temp_Avg   | UVA internal sensor temperature          |

## UOP: GIZ University of Pretoria

| Heading:       | Translation:                             |
|----------------|------------------------------------------|
| TmStamp        | Time Stamp                               |
| RecNum         | Record Number                            |
| GHI_Avg        | Global Horizontal Irradiance (GHI)       |
| DIF_Avg        | Diffuse Horizontal Irradiance (DHI)      |
| DNI_Avg        | Direct Normal Irradiance(DNI)            |
| Temp_Avg       | Temperature                              |
| RH             | Relative Humidity                        |
| Rain_Tot       | Total Rainfall                           |
| WS_Avg         | Wind Speed                               |
| WVec_Mag_Avg   | The Wind Vector Magnitude                |
| WD_Avg         | Wind Direction                           |
| WD_StdDev      | Wind direction standard deviation        |
| BP_Avg         | Barometric pressure                      |
| Bat12_Avg      | 12V Battery Average                      |
| Bat12_Min      | 12V Battery Minimum                      |
| Bat24_Avg      | 24V Battery Average                      |
| Bat24_Min      | 24V Battery Minimum                      |
| LoggerTemp_Avg | Logger Temperature                       |
| DNI_Calc_Avg   | Calculated Direct Normal Irradiance(DNI) |
| DNI_Calb_Avg   | N/A                                      |
| Calc_Azimuth   | Calculated Azimuth Angle                 |
| Calc_Tilt      | Calculated Tilt Angle                    |
| Solys_Azimuth  | Azimuth of Solys Tracker                 |
| Solys_Tilt     | Tilt of Solys Tracker                    |
| Solys_Lat      | Latitude of Solys Tracker                |
| Solys_Long     | Longitude of Solys Tracker               |
| Solys_Bar      | N/A                                      |



## GAB: USAid Gaborone

| Heading:        | Translation:                             |
|-----------------|------------------------------------------|
| TmStamp         | Time Stamp                               |
| RecNum          | Record Number                            |
| GHI_Avg         | Global Horizontal Irradiance (GHI)       |
| DIF_Avg         | Diffuse Horizontal Irradiance (DHI)      |
| DNI_Avg         | Direct Normal Irradiance(DNI)            |
| DNI Calc_Avg    | Calculated Direct Normal Irradiance(DNI) |
| Solar_Calb_Avg  | N/A                                      |
| Temp_Avg        | Temperature                              |
| RH              | Relative Humidity                        |
| Rain_Tot        | Total Rainfall                           |
| WS_Avg          | Wind Speed                               |
| WVec_Mag_Avg    | The Wind Vector Magnitude                |
| WD_Avg          | Wind Direction                           |
| WD_StdDev       | Wind direction standard deviation        |
| BP_Avg          | Barometric pressure                      |
| Bat12_Avg       | 12V Battery Average                      |
| Bat24_105Ah_Avg | 24V Battery Average                      |
| Bat12_105Ah_Avg | 12V Battery Average                      |
| LoggerTemp_Avg  | Logger Temperature                       |

## NUST: USAid Namibian University of Science and Technology

| Heading:           | Translation:                             |
|--------------------|------------------------------------------|
| TmStamp            | Time Stamp                               |
| RecNum             | Record Number                            |
| LoggerStationName  | Logger Station Name                      |
| LoggerSerialNumber | Logger Serial Number                     |
| GHI_Avg            | Global Horizontal Irradiance (GHI)       |
| DIF_Avg            | Diffuse Horizontal Irradiance (DHI)      |
| DNI_Avg            | Direct Normal Irradiance(DNI)            |
| Calc_Azimuth_Avg   | Calculated Azimuth Angle                 |
| Calc_Tilt_Avg      | Calculated Tilt Angle                    |
| DNI Calc_Avg       | Calculated Direct Normal Irradiance(DNI) |
| SolarTemp_Avg      | Solar Panel Back Temperature             |
| Temp_Avg           | Temperature                              |
| RH                 | Relative Humidity                        |
| Rain_Tot           | Total Rainfall                           |
| WS_Avg             | Wind Speed                               |
| WVec_Mag_Avg       | The Wind Vector Magnitude                |
| WD_Avg             | Wind Direction (Average)                 |
| WD_StdDev          | Wind direction standard deviation        |
| WS_Max             | Wind Direction (Maximum)                 |
| BP_Avg             | Barometric pressure                      |
| LoggerTemp_Avg     | Logger Temperature                       |
| Bat12V_Avg         | 12V Battery Average                      |
| Bat24V12V_Avg      | N/A                                      |
| Bat24V_Avg         | 24V Battery Average                      |

## **RVLD: GIZ Richtersveld**

### **Heading:**

TmStamp  
RecNum  
GHI\_Avg  
DIF\_Avg  
DNI\_Avg  
Temp\_Avg  
RH  
Rain\_Tot  
WS\_Avg  
WVec\_Mag\_Avg  
WD\_Avg  
WD\_StdDev  
BP\_Avg  
Bat12\_Avg  
Bat12\_Min  
Bat24\_Avg  
Bat24\_Min  
LoggerTemp\_Avg  
DNICalc\_Avg  
Solar\_Calb\_Avg  
GHI\_SN  
DIF\_SN  
DNI\_SN  
Solar\_Calb\_SN  
SOLYS2\_SN  
Tbatbox\_Min  
Tbatbox\_Max  
TStecaBox\_Min  
TStecaBox\_Max

### **Translation:**

Time Stamp  
Record Number  
Global Horizontal Irradiance (GHI)  
Diffuse Horizontal Irradiance (DHI)  
Direct Normal Irradiance(DNI)  
Temperature  
Relative Humidity  
Total Rainfall  
Wind Speed  
The Wind Vector Magnitude  
Wind Direction  
Wind direction standard deviation  
Barometric pressure  
12V Battery Average  
12V Battery Minimum  
24V Battery Average  
24V Battery Minimum  
Logger Temperature  
Calculated Direct Normal Irradiance(DNI)  
N/A  
Equipment serial number  
Minimum Temperature battery box  
Maximum temperature battery box  
Minimum temperature steca box  
Maximum temperature steca box

## VRD: GIZ Vanrhynsdorp

### Heading:

TmStamp  
RecNum  
GHI\_Avg  
DIF\_Avg  
DNI\_Avg  
Temp\_Avg  
RH  
Rain\_Tot  
WS\_Avg  
WVec\_Mag\_Avg  
WD\_Avg  
WD\_StdDev  
BP\_Avg  
Bat12\_Avg  
Bat12\_Min  
Bat24\_Avg  
Bat24\_Min  
LoggerTemp\_Avg  
DNICalc\_Avg  
GHI\_SN  
DIF\_SN  
DNI\_SN  
SOLYS2\_SN

### Translation:

Time Stamp  
Record Number  
Global Horizontal Irradiance (GHI)  
Diffuse Horizontal Irradiance (DHI)  
Direct Normal Irradiance(DNI)  
Temperature  
Relative Humidity  
Total Rainfall  
Wind Speed  
The Wind Vector Magnitude  
Wind Direction  
Wind direction standard deviation  
Barometric pressure  
12V Battery Average  
12V Battery Minimum  
24V Battery Average  
24V Battery Minimum  
Logger Temperature  
Calculated Direct Normal Irradiance(DNI)  
Equipment serial number  
Equipment serial number  
Equipment serial number  
Equipment serial number

## **SALT: Eskom Sutherland SALT**

### **Heading:**

TmStamp  
RecNum  
Batt\_Volt\_Avg  
WS\_ms\_S\_WVT  
WindDir\_D1\_WVT  
WindDir\_SD1\_WVT  
WS\_ms\_Max  
WindGust\_Avg  
WindGust\_Max  
WindGust\_Min  
AirTC\_Avg  
RH\_Avg  
BP\_mbar\_Avg  
Sol\_Direct\_Avg  
Sol\_Global1\_Avg  
Sol\_Global2\_Avg  
DNICalc\_Avg  
Rainfall\_Tot  
Bat12\_Min  
Bat12\_Avg  
Bat24\_Min  
Bat24\_Avg

### **Translation:**

Time Stamp  
Record Number  
Average Battery Voltage  
Wind Speed  
Wind Direction  
Wind direction standard deviation  
Maximum wind speed within the resolution time  
Average wind gust  
Maximum wind gust  
Minimum wind gust  
Ambient air temperature  
Relative Humidity  
Barometric pressure  
Direct Normal Irradiance(DNI)  
Global Horizontal Irradiance (GHI)  
Diffuse Horizontal Irradiance (DHI)  
Calculated Direct Normal Irradiance(DNI)  
Total Rainfall  
12V Battery Minimum  
12V Battery Average  
24V Battery Minimum  
24V Battery Average

## HELIO: Mariendal

### Heading:

TmStamp  
RecNum  
GHI1\_Avg  
DIF\_Avg  
DNI\_Avg  
DNICalc\_Avg  
AirTC\_Avg  
RH  
WS\_Avg  
WVec\_Mag\_Avg  
WD\_Avg  
WD\_StdDev  
WS\_ms\_Max  
Batt\_Avg  
Bat12\_Avg  
Bat24\_Avg  
LoggerTemp\_Avg  
Calc\_Azimuth  
Calc\_Tilt  
VentFan1\_Avg  
VentFan2\_Avg  
PowerAC

### Translation:

Time Stamp  
Record Number  
Global Horizontal Irradiance (GHI)  
Diffuse Horizontal Irradiance (DHI)  
Direct Normal Irradiance(DNI)  
Calculated Direct Normal Irradiance(DNI)  
Temperature  
Relative Humidity  
Wind Speed  
The Wind Vector Magnitude  
Wind Direction  
Wind direction standard deviation  
Maximum wind speed  
N/A  
12V Battery Average  
24V Battery Average  
Average logger temperature  
Calculated Azimuth Angle  
Calculated Tilt Angle  
The pyranometers have ventilators. This indicates the fan speed, whether is was on or off, or how long it was on for  
The pyranometers have ventilators. This indicates the fan speed, whether is was on or off, or how long it was on for  
AC power

## STB: Stellenbosch University

### Heading:

TmStamp

RecNum

TrackerWM\_Avg

Tracker2WM\_Avg

ShadowWM\_Avg

SunWM\_Avg

ShadowbandWM\_Avg

DNICalc\_Avg

AirTC\_Avg

RH

WS\_ms\_S\_WVT

WindDir\_D1\_WVT

WindDir\_SD1\_WVT

BP\_mB\_Avg

UVA\_Avg

UVB\_Avg

### Translation:

Time Stamp

Record Number

Direct Normal Irradiance(DNI)

Direct Normal Irradiance(DNI)

Diffuse Horizontal Irradiance (DHI)

Global Horizontal Irradiance (GHI)

Diffuse Horizontal Irradiance (DHI) Shadow Band

Calculated Direct Normal Irradiance(DNI)

Temperature

Relative Humidity

Wind Speed

Wind Direction

Wind direction standard deviation

Barometric pressure

Average UV A

Average UV B

## MRB: GIZ Murraysburg

| Heading:       | Translation:                             |
|----------------|------------------------------------------|
| TmStamp        | Time Stamp                               |
| RecNum         | Record Number                            |
| GHI_Avg        | Global Horizontal Irradiance (GHI)       |
| DIF_Avg        | Diffuse Horizontal Irradiance (DHI)      |
| DNI_Avg        | Direct Normal Irradiance(DNI)            |
| Temp_Avg       | Temperature                              |
| RH             | Relative Humidity                        |
| Rain_Tot       | Total Rainfall                           |
| WS_Avg         | Wind Speed                               |
| WVec_Mag_Avg   | The Wind Vector Magnitude                |
| WD_Avg         | Wind Direction                           |
| WD_StdDev      | Wind direction standard deviation        |
| BP_Avg         | Barometric pressure                      |
| Bat12_Avg      | 12V Battery Average                      |
| Bat12_Min      | 12V Battery Minimum                      |
| Bat24_Avg      | 24V Battery Average                      |
| Bat24_Min      | 24V Battery Minimum                      |
| LoggerTemp_Avg | Logger Temperature                       |
| DNICalc_Avg    | Calculated Direct Normal Irradiance(DNI) |
| DNICalc1_Avg   | N/A                                      |
| Calc_Azimuth   | Calculated Azimuth Angle                 |
| Calc_Tilt      | Calculated Tilt Angle                    |



## GRN: GIZ Graaff-Reinet

### Heading:

TmStamp  
RecNum  
GHI\_Avg  
DIF\_Avg  
DNI\_Avg  
Temp\_Avg  
RH  
Rain\_Tot  
WS\_Avg  
WVec\_Mag\_Avg  
WD\_Avg  
WD\_StdDev  
BP\_Avg  
Bat12\_Avg  
Bat12\_Min  
Bat24\_Avg  
Bat24\_Min  
LoggerTemp\_Avg  
DNICalc\_Avg  
DNI\_Calb\_Avg  
GHI\_SN  
DIF\_SN  
DNI\_SN  
DNI\_Calb\_SN  
SOLYS2\_SN

### Translation:

Time Stamp  
Record Number  
Global Horizontal Irradiance (GHI)  
Diffuse Horizontal Irradiance (DHI)  
Direct Normal Irradiance(DNI)  
Temperature  
Relative Humidity  
Total Rainfall  
Wind Speed  
The Wind Vector Magnitude  
Wind Direction  
Wind direction standard deviation  
Barometric pressure  
12V Battery Average  
12V Battery Minimum  
24V Battery Average  
24V Battery Minimum  
Logger Temperature  
Calculated Direct Normal Irradiance(DNI)  
N/A  
Equipment serial number  
Equipment serial number  
Equipment serial number  
Equipment serial number  
Equipment serial number

## NMU: Nelson Mandela University

### Heading:

TmStamp

RecNum

AirTC\_Avg

RH

CHP1SlrW\_Avg

CMP11\_1SlrW\_Avg

CMP11\_2SlrW\_Avg

DNICalc\_Avg

GHI2\_Avg

BP\_mbar\_Avg

### Translation:

Time Stamp

Record Number

Temperature

Relative Humidity

Direct Normal Irradiance(DNI)

Diffuse Horizontal Irradiance (DHI)

Global Horizontal Irradiance (GHI)

Calculated Direct Normal Irradiance(DNI)

Global Horizontal Irradiance (GHI)

Barometric pressure

## UFS: GIZ University of Free State

### Heading:

TmStamp  
RecNum  
GHI\_Avg  
DIF\_Avg  
DNI\_Avg  
Temp\_Avg  
RH  
Rain\_Tot  
WS\_Avg  
WVec\_Mag\_Avg  
WD\_Avg  
WD\_StdDev  
BP\_Avg  
Bat12\_Avg  
Bat12\_Min  
Bat24\_Avg  
Bat24\_Min  
LoggerTemp\_Avg  
DNICalc\_Avg  
DNI\_Calb\_Avg  
Calc\_Azimuth  
Calc\_Tilt  
Solys\_Azimuth  
Solys\_Tilt  
Solys\_Lat  
Solys\_Long  
Solys\_Bar

### Translation:

Time Stamp  
Record Number  
Global Horizontal Irradiance (GHI)  
Diffuse Horizontal Irradiance (DHI)  
Direct Normal Irradiance(DNI)  
Temperature  
Relative Humidity  
Total Rainfall  
Wind Speed  
The Wind Vector Magnitude  
Wind Direction  
Wind direction standard deviation  
Barometric pressure  
12V Battery Average  
12V Battery Minimum  
24V Battery Average  
24V Battery Minimum  
Logger Temperature  
Calculated Direct Normal Irradiance(DNI)  
N/A  
Calculated Azimuth Angle  
Calculated Tilt Angle  
Azimuth of Solys Tracker  
Tilt of Solys Tracker  
Latitude of Solys Tracker  
Longitude of Solys Tracker  
N/A

## UFH: USAid University of Fort Hare

### Heading:

TmStamp  
RecNum  
LoggerStationName  
LoggerSerialNumber  
GHI\_Avg  
DIF\_Avg  
DNI\_Avg  
Calc\_Azimuth\_Avg  
Calc\_Tilt\_Avg  
DNICalc\_Avg  
SolarTemp\_Avg  
Temp\_Avg  
RH  
Rain\_Tot  
WS\_Avg  
WVec\_Mag\_Avg  
WD\_Avg  
WD\_StdDev  
WS\_Max  
BP\_Avg  
LoggerTemp\_Avg  
Bat12V\_Avg  
Bat24V\_Avg

### Translation:

Time Stamp  
Record Number  
Logger Station Name  
Logger Serial Number  
Global Horizontal Irradiance (GHI)  
Diffuse Horizontal Irradiance (DHI)  
Direct Normal Irradiance(DNI)  
Calculated Azimuth Angle  
Calculated Tilt Angle  
Calculated Direct Normal Irradiance(DNI)  
Solar Panel Back Temperature  
Temperature  
Relative Humidity  
Total Rainfall  
Wind Speed  
The Wind Vector Magnitude  
Wind Direction (Average)  
Wind direction standard deviation  
Wind Direction (Maximum)  
Barometric pressure  
Logger Temperature  
12V Battery Average  
24V Battery Average

## CUT: Central University of Technology

### Heading:

TmStamp  
RecNum  
GHI\_Avg  
DIF\_Avg  
DNI\_Avg  
Temp\_Avg  
RH  
Rain\_Tot  
WS\_Avg  
WVec\_Mag\_Avg  
WD\_Avg  
WD\_StdDev  
BP\_Avg  
Bat12\_Avg  
Bat12\_Min  
Bat24\_Avg  
Bat24\_Min  
LoggerTemp\_Avg  
DNICalc\_Avg  
DNI\_Calb\_Avg  
Calc\_Azimuth  
Calc\_Tilt  
Solys\_Azimuth  
Solys\_Tilt  
Solys\_Lat  
Solys\_Long  
Solys\_Bar

### Translation:

Time Stamp  
Record Number  
Global Horizontal Irradiance (GHI)  
Diffuse Horizontal Irradiance (DHI)  
Direct Normal Irradiance(DNI)  
Temperature  
Relative Humidity  
Total Rainfall  
Wind Speed  
The Wind Vector Magnitude  
Wind Direction  
Wind direction standard deviation  
Barometric pressure  
12V Battery Average  
12V Battery Minimum  
24V Battery Average  
24V Battery Minimum  
Logger Temperature  
Calculated Direct Normal Irradiance(DNI)  
N/A  
Calculated Azimuth Angle  
Calculated Tilt Angle  
Azimuth of Solys Tracker  
Tilt of Solys Tracker  
Latitude of Solys Tracker  
Longitude of Solys Tracker  
N/A

## WST: University of KwaZulu-Natal Westville

### Heading:

TmStamp

RecNum

TrackerWM\_Avg

ShadowWM\_Avg

SunWM\_Avg

### Translation:

Time Stamp

Record Number

Direct Normal Irradiance(DNI)

Diffuse Horizontal Irradiance (DHI)

Global Horizontal Irradiance (GHI)
